# Supplementary material for: Development of an in-stream environmental exposure model for assessing down-the-drain chemicals in Southern Ontario
Source: Oxford University Press journal article supplement (doi:10.2166/wqrj.2017.019), 2017-09-26
Supplement: wqrj2017019supp.docx [file wqrj2017019supp.docx]

**
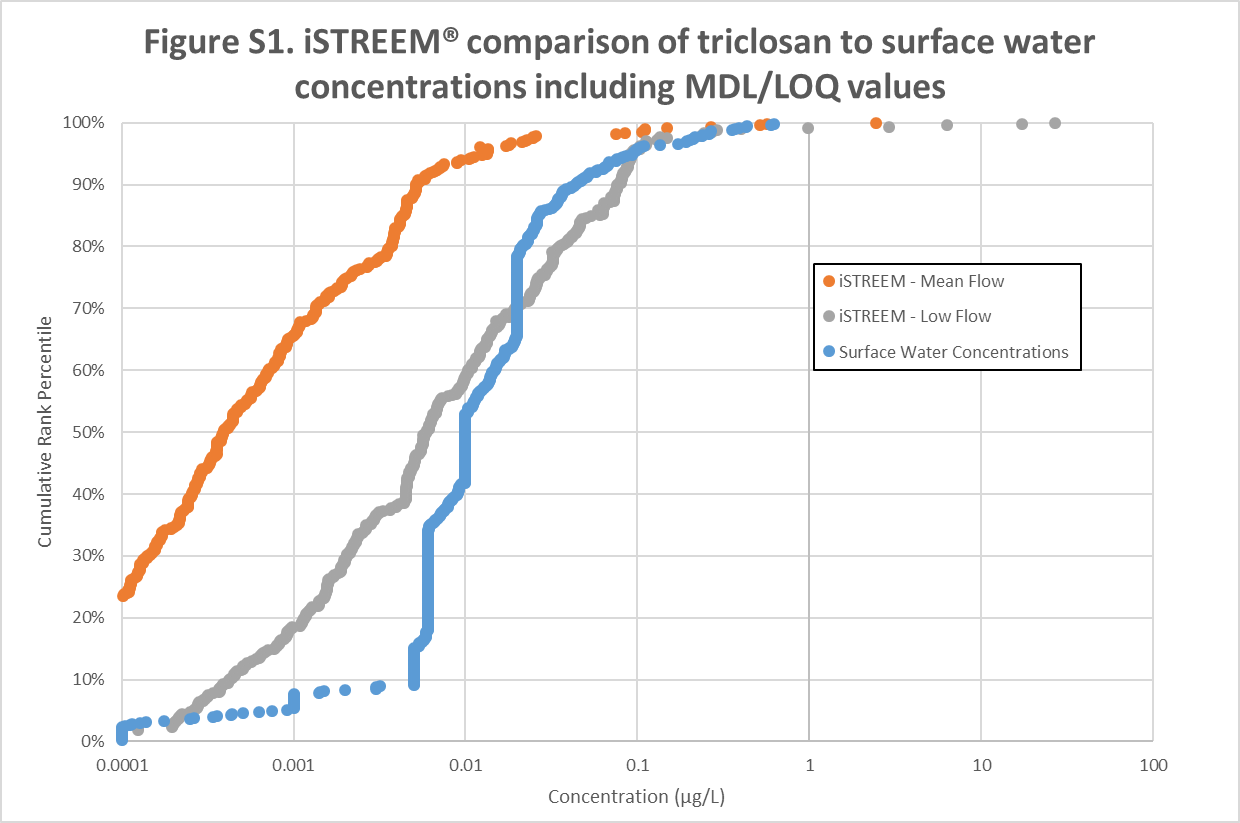

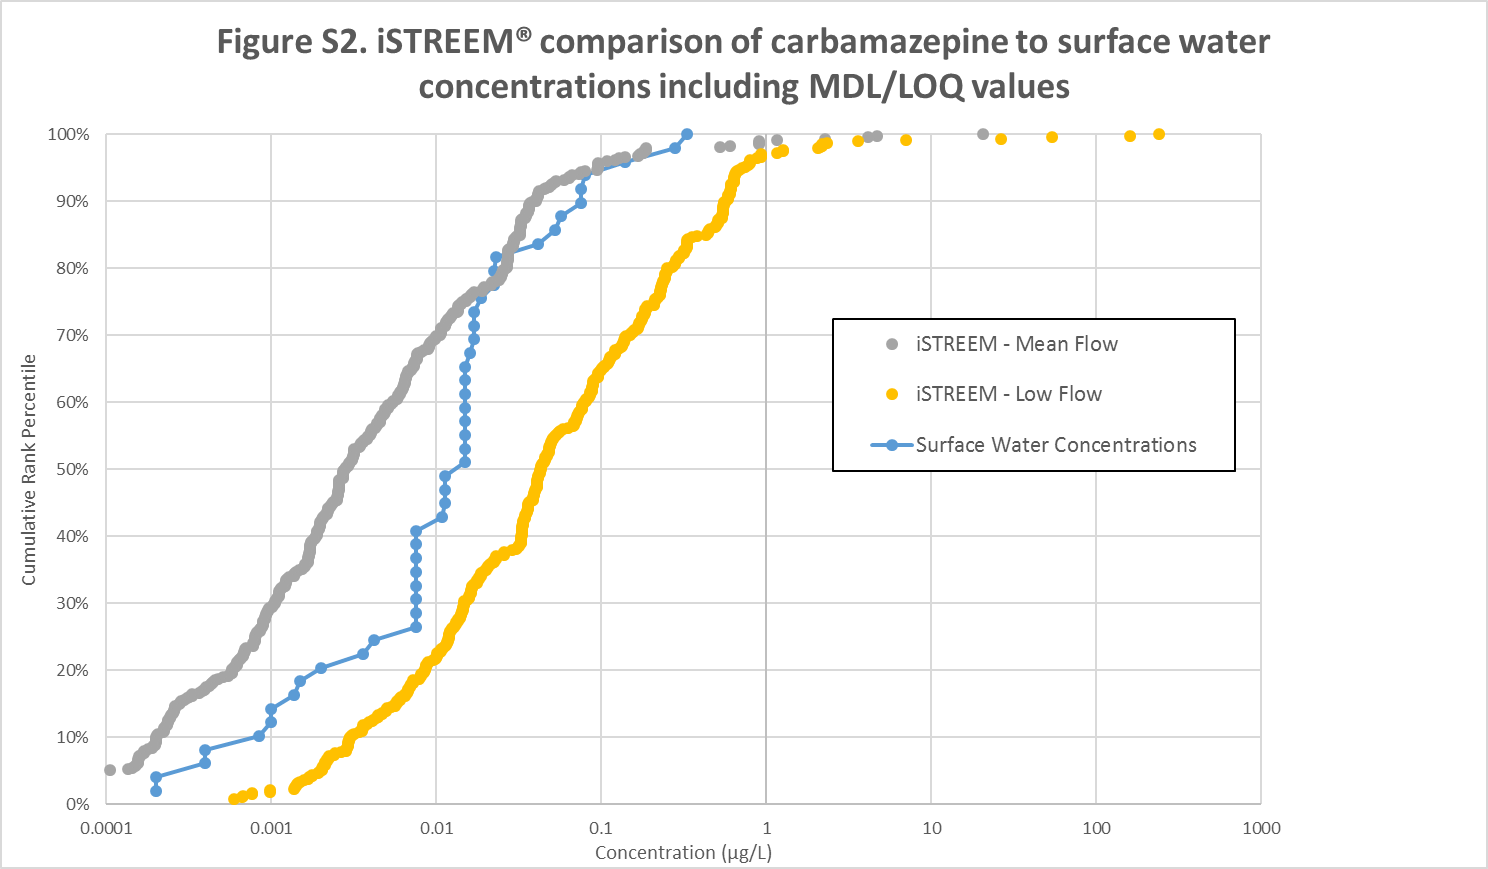
Supplementary material**

**
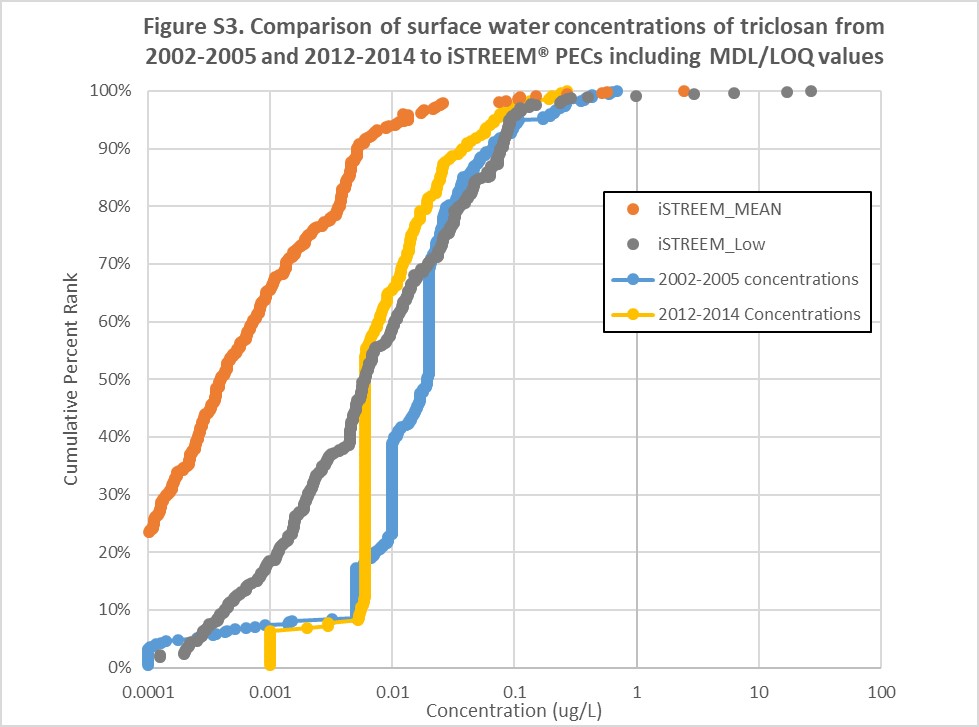
**

**
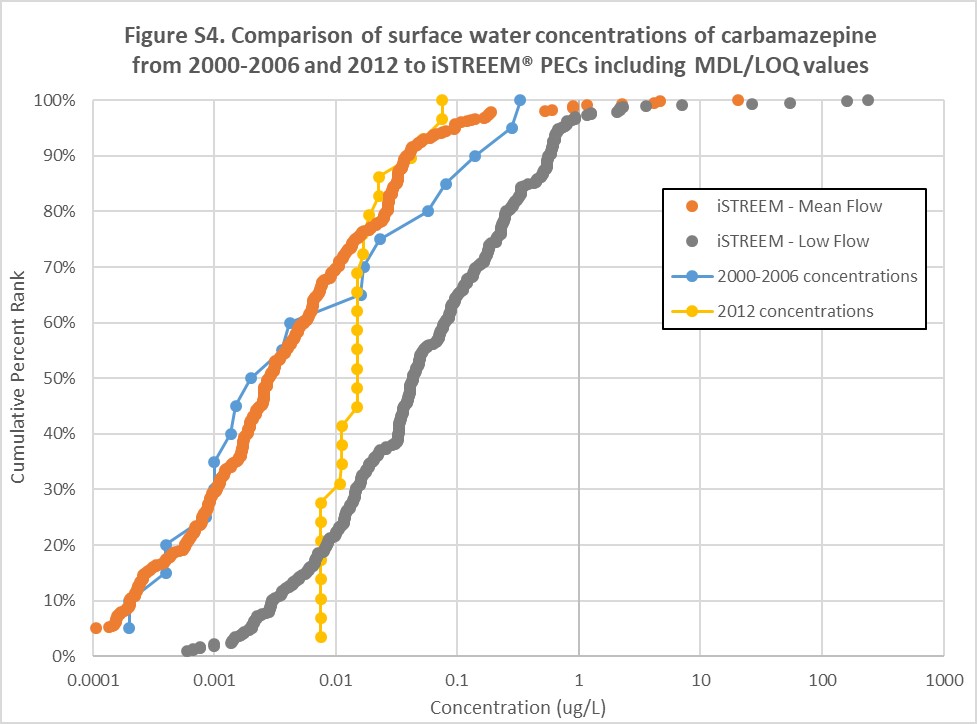
**

**
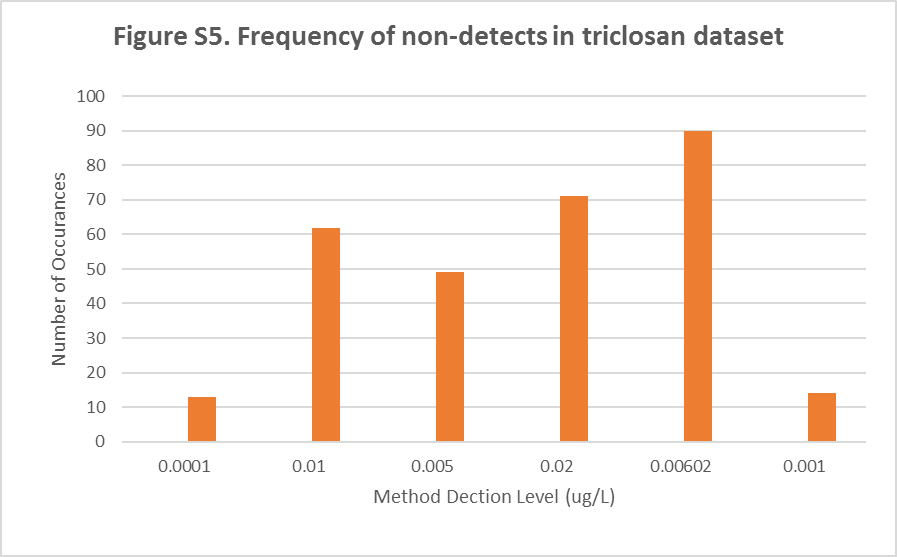
**

**Figure S1** | iSTREEM® comparison of triclosan to surface water concentrations including MDL/LOQ values.

**Figure S2** | iSTREEM® comparison of carbamazepine to surface water concentrations including MDL/LOQ values.

**Figure S3** | Comparisons of surface water concentrations of triclosan from 2002 to 2005 and 2012 to 2014 to iSTREEM® including MDL/LOQ values.

**Figure S4** | Comparisons of surface water concentrations of carbamazepine from 2000 to 2006 and 2012 to iSTREEM® PEC including MDL/LOQ values.

**Figure S5** | Frequency of non-detects in triclosan dataset.
